# Supplementary material for: Greater Sunlight Exposure during Early Fruit Development Increases Polyphenol Concentration, Soluble Solid Concentration, and Fruit Mass of Cider Apples
Source: MDPI journal article supplement (doi:10.3390/horticulturae8110993), 2022-10-26
Supplement: s1 [file s1]

## Supplemental Materials

### Supplemental Figure

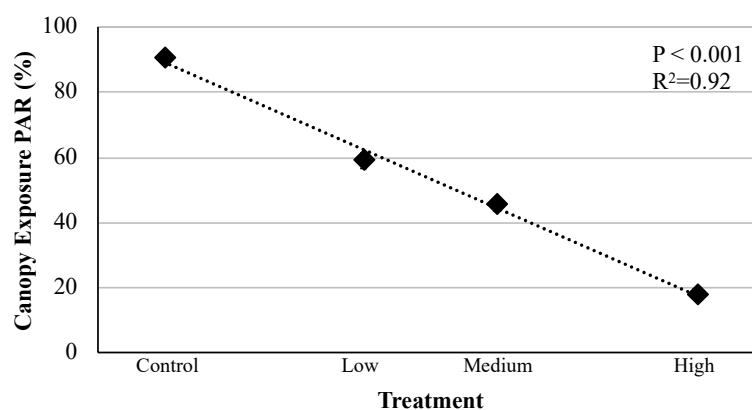

**Supplementary Figure S1.** Percentage of plant assimilable radiation (PAR) permeating the canopy and shadedcloth in Experiment 3 of 'Major', 'Ellis Bitter', and 'Harry Masters Jersey' apple trees grown in Lansing, NY. Branches on individual trees were subjected to different shading opacities from week four after full bloom until harvest. Values are means  $\pm$  standard error ( $n = 8$  'Major' 2016, 8 'Ellis Bitter' 2016, 8 'Major' 2017, and 8 'Harry Masters Jersey' 2017=32).

## Supplemental Tables

**Supplementary Table S1.** Harvest dates of experiments in different cultivars and years within this study. ('HMJ'='Harry Masters Jersey', 'SRS'='Somerset Redstreak').

| Experiment                     | Year | Cultivar       | Harvest Date |
|--------------------------------|------|----------------|--------------|
| Experiment 1: "Early Tree"     | 2018 | 'Dabinett'     | 10 October   |
| Experiment 2: "Early Branch"   | 2018 | 'Ellis Bitter' | 30 August    |
|                                |      | 'Major'        | 3 September  |
| Experiment 3: "Late Branch"    | 2016 | 'Major'        | 1 September  |
|                                |      | 'Ellis Bitter' | 31 August    |
|                                | 2017 | 'Major'        | 5 September  |
|                                |      | 'HMJ'          | 21 September |
|                                | 2016 | 'GoldRush'     | 1 November   |
| Experiment 4: "Fruit Location" | 2016 | 'Major'        | 1 September  |
|                                |      | 'GoldRush'     | 1 November   |
|                                | 2017 | 'HMJ'          | 15 September |
|                                |      | 'GoldRush'     | 30 October   |
|                                | 2018 | 'SRS'          | 18 September |
| Experiment 5: "Fruit Bagging"  | 2016 | 'GoldRush'     | 1 November   |
|                                |      | 'Ellis Bitter' | 31 August    |
|                                | 2017 | 'GoldRush'     | 1 November   |
|                                |      | 'Major'        | 5 September  |
|                                |      | 'Ellis Bitter' | 3 September  |

**Supplementary Table S2.** Percentage of plant assimilable radiation (PAR) permeating the canopy and shade cloth, and photosynthesis rate of Control leaves exposed to 1,500  $\mu\text{mol}/\text{m}^2/\text{s}$  of photons and Shade leaves exposed to 500  $\mu\text{mol}/\text{m}^2/\text{s}$  of photons in cv. 'Dabinett' apple trees grown in Lansing, NY. Treatment trees were shaded during weeks 1-5 after full bloom in Experiment 1. Values are means  $\pm$  standard error (n=6).

| Treatment      | Canopy Exposure PAR (%) | Photosynthesis Rate ( $\mu\text{mol CO}_2/\text{m}^2/\text{s}$ ) |
|----------------|-------------------------|------------------------------------------------------------------|
| Control        | 47.9 $\pm$ 3.9          | 20.9 $\pm$ 0.5                                                   |
| Shade          | 13.8 $\pm$ 1.1          | 12.9 $\pm$ 0.5                                                   |
| <i>P-value</i> | <0.001                  | <0.001                                                           |

**Supplementary Table S3.** Percentage of plant assimilable radiation (PAR) permeating the canopy and shade cloth two and four weeks after full bloom (WAFB) from cv 'Ellis Bitter' and 'Major' apple trees grown in Lansing, NY. Branches on individual trees were subjected to different shading treatments during weeks 1-5 after full bloom in Experiment 2. Values are means  $\pm$  standard error ('Ellis Bitter' n=7, 'Major' n=8). Different lowercase letters indicate a separation of treatments by the Tukey HSD method at a 5% significance level.

| Cultivar       | Treatment                   | Canopy Exposure PAR Availability (%) |                             |
|----------------|-----------------------------|--------------------------------------|-----------------------------|
|                |                             | Week 2                               | Week 4                      |
| 'Ellis Bitter' | Control                     | 59.1 $\pm$ 3.7                       | 65.6 $\pm$ 2.5              |
| 'Major'        |                             | 53.1 $\pm$ 6.0 <sup>a</sup>          | 58.0 $\pm$ 5.3 <sup>a</sup> |
| 'Ellis Bitter' | 1-3 WAFB                    | 22.6 $\pm$ 2.0                       | 62.5 $\pm$ 3.1              |
| 'Major'        |                             | 20.3 $\pm$ 1.4 <sup>b</sup>          | 54.5 $\pm$ 4.7 <sup>a</sup> |
| 'Ellis Bitter' | 3-5 WAFB                    | 51.7 $\pm$ 4.1                       | 20.7 $\pm$ 1.7              |
| 'Major'        |                             | 49.6 $\pm$ 2.8 <sup>a</sup>          | 18.7 $\pm$ 1.7 <sup>b</sup> |
| 'Ellis Bitter' | 1-5 WAFB                    | 20.1 $\pm$ 1.6                       | 18.0 $\pm$ 2.6              |
| 'Major'        |                             | 17.6 $\pm$ 2.1 <sup>b</sup>          | 18.3 $\pm$ 1.3 <sup>b</sup> |
| <i>P-value</i> | Treatment                   | <0.001                               | <0.001                      |
|                | Cultivar                    | 0.677                                | 0.077                       |
|                | Treatment $\times$ Cultivar | 0.904                                | 0.263                       |
|                |                             |                                      |                             |

**Supplementary Table S4.** Mass of fruit at different stages of development from 'Dabinett' apple trees grown in Lansing, NY. Trees were either shaded or un-shaded during weeks 1-5 after full bloom in Experiment 1. Values are means  $\pm$  standard error (n=6).

| Treatment      | Mass (g)        |                 |                  |                  |                  |               |                   |
|----------------|-----------------|-----------------|------------------|------------------|------------------|---------------|-------------------|
|                | Week 1          | Week 3          | Week 5           | Week 7           | Week 9           | Week 12       | Week 20 (Harvest) |
| Control        | 0.29 $\pm$ 0.02 | 4.94 $\pm$ 0.22 | 12.70 $\pm$ 0.19 | 15.83 $\pm$ 0.55 | 29.19 $\pm$ 0.90 | 42 $\pm$ 0.94 | 63.46 $\pm$ 2.25  |
| Shade          | 0.30 $\pm$ 0.02 | 3.47 $\pm$ 0.24 | 7.78 $\pm$ 0.23  |                  |                  |               | 56.84 $\pm$ 1.65  |
| <i>P-value</i> | 0.457           | 0.001           | <0.001           | -                | -                | -             | 0.039             |

**Supplementary Table S5.** Mass of fruit at different stages of development from 'Ellis Bitter' and 'Major' apple trees grown in Lansing, NY. Branches on individual trees were subjected to different shading treatments during weeks 1-5 after full bloom in Experiment 2. Values are means  $\pm$  standard error ('Ellis Bitter' n=7, 'Major' n=8). Different lowercase letters indicate a separation of treatments by the Tukey HSD method at a 5% significance level.

| Cultivar       | Treatment                   | Mass (g)        |                               |                              |                  |                  |                  |                   |
|----------------|-----------------------------|-----------------|-------------------------------|------------------------------|------------------|------------------|------------------|-------------------|
|                |                             | Week 1          | Week 3                        | Week 5                       | Week 7           | Week 9           | Week 12          | Week 14 (Harvest) |
| 'Ellis Bitter' | Control                     | 0.30 $\pm$ 0.03 | 6.21 $\pm$ 0.55               | 16.73 $\pm$ 0.62             | 19.66 $\pm$ 0.69 | 33.32 $\pm$ 1.2  | 48.81 $\pm$ 1.85 | 93.25 $\pm$ 3.16  |
| 'Major'        |                             | 0.12 $\pm$ 0.01 | 2.16 $\pm$ 0.28 <sup>ab</sup> | 9.58 $\pm$ 0.45 <sup>a</sup> | 14.07 $\pm$ 0.32 | 21.78 $\pm$ 1.07 | 46.78 $\pm$ 1.04 | 76.27 $\pm$ 2.95  |
| 'Ellis Bitter' | 1-3                         | 0.28 $\pm$ 0.02 | 4.91 $\pm$ 0.49               | 13.77 $\pm$ 1.26             | -                | -                | -                | 89.71 $\pm$ 4.32  |
| 'Major'        |                             | 0.12 $\pm$ 0.01 | 2.04 $\pm$ 0.19 <sup>b</sup>  | 8.18 $\pm$ 0.53 <sup>b</sup> | -                | -                | -                | 75.2 $\pm$ 2.39   |
| 'Ellis Bitter' | 3-5                         | 0.31 $\pm$ 0.02 | 6.23 $\pm$ 0.27               | 13.21 $\pm$ 0.77             | -                | -                | -                | 95.25 $\pm$ 4.76  |
| 'Major'        |                             | 1.30 $\pm$ 0.01 | 2.54 $\pm$ 0.25 <sup>a</sup>  | 7.33 $\pm$ 0.42 <sup>b</sup> | -                | -                | -                | 65.6 $\pm$ 3.52   |
| 'Ellis Bitter' | 1-5                         | 0.29 $\pm$ 0.03 | 5.20 $\pm$ 0.19               | 12.73 $\pm$ 1.05             | -                | -                | -                | 86.74 $\pm$ 4.88  |
| 'Major'        |                             | 0.13 $\pm$ 0.01 | 2.03 $\pm$ 0.23 <sup>ab</sup> | 7.26 $\pm$ 0.56 <sup>b</sup> | -                | -                | -                | 72.92 $\pm$ 2.20  |
| <i>P-value</i> | Treatment                   | 0.551           | 0.001                         | <0.001                       | -                | -                | -                | 0.518             |
|                | Cultivar                    | <0.001          | <0.001                        | <0.001                       | -                | -                | -                | <0.001            |
|                | Treatment $\times$ Cultivar | 0.679           | 0.212                         | 0.575                        | -                | -                | -                | 0.114             |

**Supplementary Table S6.** Diameter of fruit at different stages of development from 'Dabinett' apple trees grown in Lansing, NY. Trees were either shaded or un-shaded during weeks 1-5 after full bloom in Experiment 1. Values are means  $\pm$  standard error (n=6).

| Treatment      | Diameter (mm)   |                  |                  |                  |                  |                  |                   |
|----------------|-----------------|------------------|------------------|------------------|------------------|------------------|-------------------|
|                | Week 1          | Week 3           | Week 5           | Week 7           | Week 9           | Week 12          | Week 20 (Harvest) |
| Control        | 6.02 $\pm$ 0.15 | 20.33 $\pm$ 0.34 | 29.47 $\pm$ 0.19 | 31.66 $\pm$ 0.38 | 39.67 $\pm$ 0.45 | 45.96 $\pm$ 0.39 | 51.24 $\pm$ 0.73  |
| Shade          | 6.20 $\pm$ 0.21 | 17.92 $\pm$ 0.43 | 24.54 $\pm$ 0.29 |                  |                  |                  | 49.66 $\pm$ 0.50  |
| <i>P-value</i> | 0.516           | 0.001            | <0.001           | -                | -                | -                | 0.102             |

**Supplementary Table S7.** Diameter of fruit at different stages of development from 'Ellis Bitter' and 'Major' apple trees grown in Lansing, NY. Branches on individual trees were subjected to different shading treatments during the five weeks after full bloom (WAFB) in Experiment 2. Values are means  $\pm$  standard error ('Ellis Bitter' n=7, 'Major' n=8). Different lowercase letters indicate a separation of treatments by the Tukey HSD method at a 5% significance level.

| Cultivar       | Treatment                   | Diameter (mm)   |                               |                               |                  |                  |                  |                   |
|----------------|-----------------------------|-----------------|-------------------------------|-------------------------------|------------------|------------------|------------------|-------------------|
|                |                             | Week 1          | Week 3                        | Week 5                        | Week 7           | Week 9           | Week 12          | Week 14 (Harvest) |
| 'Ellis Bitter' | Control                     | 5.91 $\pm$ 0.40 | 22.23 $\pm$ 0.81 <sup>a</sup> | 32.73 $\pm$ 0.63              | 34.84 $\pm$ 0.57 | 41.42 $\pm$ 0.49 | 48.64 $\pm$ 0.65 | 61.37 $\pm$ 0.69  |
| 'Major'        |                             | 3.68 $\pm$ 0.25 | 14.52 $\pm$ 0.72 <sup>b</sup> | 26.53 $\pm$ 0.46 <sup>a</sup> | 30.78 $\pm$ 0.27 | 36.09 $\pm$ 0.67 | 47.85 $\pm$ 0.44 | 56.54 $\pm$ 0.76  |
| 'Ellis Bitter' | 1-3 WAFB                    | 5.76 $\pm$ 0.27 | 20.09 $\pm$ 1.02 <sup>b</sup> | 30.21 $\pm$ 1.16 <sup>b</sup> | -                | -                | -                | 61.31 $\pm$ 1.17  |
| 'Major'        |                             | 3.77 $\pm$ 0.21 | 14.39 $\pm$ 0.54 <sup>b</sup> | 25.07 $\pm$ 0.68 <sup>b</sup> | -                | -                | -                | 55.84 $\pm$ 0.71  |
| 'Ellis Bitter' | 3-5 WAFB                    | 6.13 $\pm$ 0.26 | 22.54 $\pm$ 0.38 <sup>a</sup> | 30.02 $\pm$ 0.64 <sup>b</sup> | -                | -                | -                | 61.28 $\pm$ 0.95  |
| 'Major'        |                             | 3.80 $\pm$ 0.22 | 15.82 $\pm$ 0.52 <sup>a</sup> | 24.00 $\pm$ 0.48 <sup>b</sup> | -                | -                | -                | 53.00 $\pm$ 0.94  |
| 'Ellis Bitter' | 1-5 WAFB                    | 5.96 $\pm$ 0.37 | 5.96 $\pm$ 0.37 <sup>b</sup>  | 29.51 $\pm$ 0.88 <sup>b</sup> | -                | -                | -                | 60.31 $\pm$ 1.58  |
| 'Major'        |                             | 3.89 $\pm$ 0.57 | 3.89 $\pm$ 0.57 <sup>b</sup>  | 23.83 $\pm$ 0.64 <sup>b</sup> | -                | -                | -                | 55.23 $\pm$ 0.53  |
| <i>P-value</i> | Treatment                   | 0.541           | 0.009                         | <0.001                        | -                | -                | -                | 0.240             |
|                | Cultivar                    | <0.001          | <0.001                        | <0.001                        | -                | -                | -                | <0.001            |
|                | Treatment $\times$ Cultivar | 0.706           | 0.451                         | 0.861                         | -                | -                | -                | 0.253             |

**Supplementary Table S8.** Total polyphenol concentrations (gallic acid equivalents) of dried fruit cortex tissue at different stages of development and juice from cv 'Dabinett' apple trees grown in Lansing, NY. Trees were either shaded or un-shaded during weeks 1-5 after full bloom in Experiment 1. Values are means  $\pm$  standard error (n=6).

| Treatment      | Cortex Tissue Total Polyphenols (mg/g) |                   |                  |                  |                  |                  | Juice (g/L)          |                      |
|----------------|----------------------------------------|-------------------|------------------|------------------|------------------|------------------|----------------------|----------------------|
|                | Week 1                                 | Week 3            | Week 5           | Week 7           | Week 9           | Week 12          | Week 20<br>(Harvest) | Week 20<br>(Harvest) |
| Control        | 60.90 $\pm$ 1.92                       | 113.30 $\pm$ 2.82 | 96.28 $\pm$ 2.02 | 51.44 $\pm$ 3.75 | 39.54 $\pm$ 0.71 | 27.41 $\pm$ 0.94 | 11.02 $\pm$ 0.3      | 1.28 $\pm$ 0.1       |
| Shade          | 66.3.0 $\pm$ 2.17                      | 93.00 $\pm$ 2.62  | 83.71 $\pm$ 1.63 | -                | -                | -                | 8.36 $\pm$ 0.45      | 0.99 $\pm$ 0.07      |
| <i>P-value</i> | 0.150                                  | 0.002             | 0.003            | -                | -                | -                | 0.005                | 0.047                |



**Supplementary Table S9.** Total polyphenol concentrations (gallic acid equivalents) of dried fruit cortex tissue at different stages of development and juice from cv 'Ellis Bitter' and 'Major' apple trees grown in Lansing, NY. Branches on individual trees were subjected to different shading treatments during in the five weeks after full bloom (WAFB) in Experiment 2. Values are means  $\pm$  standard error ('Ellis Bitter' n=7, 'Major' n=8). Different lowercase letters indicate a mean separation among treatments by the Tukey HSD method at a 5% significance level.

| Cortex Tissue Total Polyphenols (mg/g) |                                |                  |                                |                                 |                  |                  |                  |                                |                                     |
|----------------------------------------|--------------------------------|------------------|--------------------------------|---------------------------------|------------------|------------------|------------------|--------------------------------|-------------------------------------|
| Cultivar                               | Treatment                      | Week 1           | Week 3                         | Week 5                          | Week 7           | Week 9           | Week 12          | Week 14<br>(Harvest)           | Juice (g/L)<br>Week 14<br>(Harvest) |
| 'Ellis Bitter'                         | Control                        | 62.48 $\pm$ 4.29 | 125.12 $\pm$ 2.52              | 80.00 $\pm$ 3.70                | 61.79 $\pm$ 1.63 | 45.77 $\pm$ 0.83 | 30.86 $\pm$ 1.80 | 22.14 $\pm$ 0.98               | 0.76 $\pm$ 0.05                     |
| 'Major'                                |                                | 45.90 $\pm$ 2.80 | 136.38 $\pm$ 1.73 <sup>a</sup> | 102.29 $\pm$ 1.44 <sup>a</sup>  | 55.36 $\pm$ 1.19 | 39.51 $\pm$ 0.6  | 25.24 $\pm$ 0.57 | 19.75 $\pm$ 0.88 <sup>a</sup>  | 1.07 $\pm$ 0.09 <sup>a</sup>        |
| 'Ellis Bitter'                         | 1-3 WAFB                       | 63.89 $\pm$ 4.67 | 115.09 $\pm$ 3.46              | 73.8 $\pm$ 1.42                 | -                | -                | -                | 22.57 $\pm$ 0.73               | 0.66 $\pm$ 0.04                     |
| 'Major'                                |                                | 43.42 $\pm$ 2.87 | 127.88 $\pm$ 5.69 <sup>b</sup> | 101.62 $\pm$ 3.46 <sup>ab</sup> | -                | -                | -                | 19.25 $\pm$ 0.55 <sup>ab</sup> | 0.75 $\pm$ 0.07 <sup>b</sup>        |
| 'Ellis Bitter'                         | 3-5 WAFB                       | 66.70 $\pm$ 3.72 | 126.89 $\pm$ 2.17              | 73.21 $\pm$ 1.07                | -                | -                | -                | 20.03 $\pm$ 0.69               | 0.65 $\pm$ 0.07                     |
| 'Major'                                |                                | 39.74 $\pm$ 3.13 | 138.72 $\pm$ 2.67 <sup>a</sup> | 100.30 $\pm$ 2.14 <sup>ab</sup> | -                | -                | -                | 19.80 $\pm$ 0.98 <sup>ab</sup> | 0.82 $\pm$ 0.06 <sup>b</sup>        |
| 'Ellis Bitter'                         | 1-5 WAFB                       | 56.63 $\pm$ 4.73 | 114.01 $\pm$ 1.99              | 71.72 $\pm$ 2.80                | -                | -                | -                | 20.29 $\pm$ 0.54               | 0.59 $\pm$ 0.08                     |
| 'Major'                                |                                | 40.73 $\pm$ 2.66 | 124.34 $\pm$ 3.72 <sup>b</sup> | 93.18 $\pm$ 2.72 <sup>b</sup>   | -                | -                | -                | 17.34 $\pm$ 0.95 <sup>b</sup>  | 0.83 $\pm$ 0.15 <sup>b</sup>        |
| <i>P-value</i>                         | Treatment                      | 0.126            | <0.001                         | 0.007                           | -                | -                | -                | 0.030                          | 0.012                               |
|                                        | Cultivar                       | 0.004            | 0.004                          | <0.001                          | -                | -                | -                | 0.005                          | 0.034                               |
|                                        | Treatment<br>$\times$ Cultivar | 0.124            | 0.974                          | 0.423                           | -                | -                | -                | 0.214                          | 0.470                               |

**Supplementary Table S10.** Percentage of plant assimilable radiation (PAR) permeating the canopy and shade cloth in June, July, and August of 'Major', 'Ellis Bitter', and 'Harry Masters Jersey' ('HMJ') apple trees grown in Lansing, NY in 2016 and 2017. Branches on individual trees were subjected to different shading opacities from four weeks after full bloom until harvest in Experiment 3. Values are means  $\pm$  standard error (n= 8 'Major' 2016, 8 'Ellis Bitter' 2016, 8 'Major' 2017, and 8 'HMJ' 2017=32).

| Year           | Cultivar             | Treatment | Canopy Exposure PAR (%) |          |          |
|----------------|----------------------|-----------|-------------------------|----------|----------|
|                |                      |           | June                    | July     | August   |
| 2016           | 'Major'              | Control   | 91.5±2.2                | 90.9±3.2 | 89.5±3.2 |
| 2016           | 'Ellis Bitter'       |           | 88.8±3.6                | 86.2±4.9 | 85.4±4.9 |
| 2017           | 'Major'              |           | 92.7±1.4                | 90.4±1.9 | 91±2.2   |
| 2017           | 'HMJ'                |           | 95.3±1.0                | 92.9±1.6 | 94.4±1.9 |
| 2016           | 'Major'              | Low       | 52.9±3.9                | 53.5±4.7 | 53.6±6.4 |
| 2016           | 'Ellis Bitter'       |           | 48.8±4.1                | 51.8±6.8 | 43.3±5.9 |
| 2017           | 'Major'              |           | 50.8±1.3                | 52.2±4.8 | 58.9±6.3 |
| 2017           | 'HMJ'                |           | 52.2±3.2                | 60.3±4.4 | 52.6±2.3 |
| 2016           | 'Major'              | Medium    | 35.3±3.5                | 38.5±5.5 | 35.7±4.8 |
| 2016           | 'Ellis Bitter'       |           | 36.9±3.8                | 42.7±3.2 | 33.2±4.7 |
| 2017           | 'Major'              |           | 39.7±1.5                | 33.8±3.2 | 30.0±2.9 |
| 2017           | 'HMJ'                |           | 38.6±1.8                | 38.4±4.1 | 36.5±1.9 |
| 2016           | 'Major'              | High      | 15.5±2.2                | 13.4±2.5 | 11.3±2.5 |
| 2016           | 'Ellis Bitter'       |           | 18.1±1.6                | 16.6±2.5 | 12.4±3.8 |
| 2017           | 'Major'              |           | 15.4±1.8                | 9.7±2.1  | 11.8±1.6 |
| 2017           | 'HMJ'                |           | 17.6±2.1                | 15.6±2.6 | 13.8±2   |
| <i>P-value</i> | Treatment            |           | <0.001                  | <0.001   | <0.001   |
|                | Cultivar             |           | 0.845                   | 0.330    | 0.435    |
|                | Year                 |           | 0.726                   | 0.467    | 0.898    |
|                | Treatment × Cultivar |           | 0.570                   | 0.436    | 0.683    |
|                | Treatment × Year     |           | 0.952                   | 0.578    | 0.658    |

**Supplementary Table S11.** Growing degree days base 10 °C inside shading enclosures of 'Major' and 'Harry Masters Jersey' ('HMJ') apple trees grown in Lansing, NY in 2017. Branches on individual trees were subjected to different shading opacities from four weeks after full bloom until harvest in Experiment 3. Values are means  $\pm$  standard error (n= 4 'Major' and 4 'HMJ'=8).

| Cultivar       | Treatment                   | Growing Degree Days Base 10 °C |                                        |
|----------------|-----------------------------|--------------------------------|----------------------------------------|
|                |                             | 4-6 Weeks After Full Bloom     | 4 Weeks After Full Bloom Until Harvest |
| 'Major'        | Control                     | 140.4 $\pm$ 7.7                | 764.0 $\pm$ 37.4                       |
| 'HMJ'          |                             | 136.5 $\pm$ 5.0                | 826.4 $\pm$ 30.3                       |
| 'Major'        | Low                         | 128.0 $\pm$ 2.4                | 700.7 $\pm$ 13.4                       |
| 'HMJ'          |                             | 123.1 $\pm$ 3.1                | 741.1 $\pm$ 28.3                       |
| 'Major'        | Medium                      | 124.6 $\pm$ 3.1                | 699.4 $\pm$ 21.3                       |
| 'HMJ'          |                             | 126.6 $\pm$ 3.1                | 759.5 $\pm$ 22.0                       |
| 'Major'        | High                        | 122.2 $\pm$ 5.0                | 697.2 $\pm$ 30.8                       |
| 'HMJ'          |                             | 132.4 $\pm$ 3.4                | 813.1 $\pm$ 20.8                       |
| <i>P-value</i> | Treatment                   | 0.024                          | 0.026                                  |
|                | Cultivar                    | 0.813                          | 0.025                                  |
|                | Treatment $\times$ Cultivar | 0.101                          | 0.453                                  |

**Supplementary Table S12.** Harvest and fruit characteristics of 'Major', 'Ellis Bitter', and 'Harry Masters Jersey' ('HMJ') apple trees grown in Lansing, NY in 2016 and 2017. Branches on individual trees were subjected to different shading opacities from four weeks after full bloom until harvest in Experiment 3. Values are means  $\pm$  standard error (n= 8 'Major' 2016, 8 'Ellis Bitter' 2016, 8 'Major' 2017, and 8 'HMJ' 2017=32).

| Year           | Cultivar       | Treatment | Mass (g)                | Yield (g) | Yield (g) /<br>Leaf Count | Peel Blush (%) | Starch Pattern<br>Index (1-8) | Firmness (N) | Chlorophyll<br>a Index |        |
|----------------|----------------|-----------|-------------------------|-----------|---------------------------|----------------|-------------------------------|--------------|------------------------|--------|
| 2016           | 'Major'        | Control   | 59.8±4.0                | 437±64    | 7.3±1.3                   | 48.6±5.4       | 4.5±0.5                       | 63.6±4.0     | -                      |        |
| 2016           | 'Ellis Bitter' |           | 51.3±1.6                | 728±62    | 10.5±1.5                  | 19.4±2.6       | 7.4±0.1                       | 74.1±1.1     | -                      |        |
| 2017           | 'Major'        |           | 66.2±5.1                | 785±103   | 10.3±1.6                  | 50.0±6.2       | 5.5±0.3                       | 73.2±3.5     | 1.05±0.09              |        |
| 2017           | 'HMJ'          |           | 68.1±3.5                | 771±77    | 9.1±0.6                   | 99.6±8.1       | 6.8±0.3                       | 74.2±2.6     | 0.36±0.04              |        |
| 2016           | 'Major'        | Low       | 53.3±5.3                | 387±110   | 4.5±1.2                   | 36.1±9.6       | 5.1±0.7                       | 71.9±2.1     | -                      |        |
| 2016           | 'Ellis Bitter' |           | 53.6±3.3                | 766±125   | 7.5±1.1                   | 29.1±4.8       | 7.1±0.3                       | 74.4±1.8     | -                      |        |
| 2017           | 'Major'        |           | 60.0±3.9                | 645±61    | 8.9±1.0                   | 27.8±6.1       | 5.6±0.6                       | 72.2±3.1     | 1.23±0.09              |        |
| 2017           | 'HMJ'          |           | 58.5±2.2                | 692±63    | 8.8±1.3                   | 92±10.9        | 6.7±0.2                       | 77.1±2.9     | 0.42±0.05              |        |
| 2016           | 'Major'        | Medium    | 55.9±3.0                | 499±153   | 6.4±1.9                   | 42.1±8.5       | 5.6±0.8                       | 69.4±1.6     | -                      |        |
| 2016           | 'Ellis Bitter' |           | 51.1±2.4                | 673±78    | 12.2±2                    | 38.5±3.5       | 7.2±0.1                       | 74.1±1.9     | -                      |        |
| 2017           | 'Major'        |           | 58.2±4.6                | 634±63    | 7.6±1.0                   | 20.4±5.5       | 5.5±0.4                       | 71.7±2.6     | 1.22±0.08              |        |
| 2017           | 'HMJ'          |           | 55.1±2.2                | 461±71    | 6.1±0.7                   | 53.8±3.7       | 6.4±0.4                       | 71.8±3.1     | 0.57±0.11              |        |
| 2016           | 'Major'        | High      | 57.8±2.7                | 381±91    | 7.2±2.2                   | 21.2±7.5       | 5.7±0.7                       | 71.2±1.7     | -                      |        |
| 2016           | 'Ellis Bitter' |           | 58.0±2.3                | 738±157   | 11.5±1.8                  | 8.7±2.6        | 6.8±0.1                       | 71.6±1.2     | -                      |        |
| 2017           | 'Major'        |           | 56.3±2.8                | 545±58    | 8.1±1.5                   | 21.9±3.1       | 6.3±0.5                       | 70.7±2.2     | 1.1±0.11               |        |
| 2017           | 'HMJ'          |           | 56.1±3.4                | 485±32    | 6.9±0.5                   | 71.1±4.4       | 6.6±0.3                       | 69.2±2.4     | 0.48±0.08              |        |
| <i>P-value</i> |                |           | Treatment               | 0.022     | 0.009                     | 0.485          | <0.001                        | 0.760        | 0.131                  | 0.230  |
|                |                |           | Cultivar                | 0.310     | 0.004                     | 0.018          | <0.001                        | <0.001       | 0.226                  | <0.001 |
|                |                |           | Year                    | 0.340     | 0.010                     | 0.088          | 0.172                         | 0.323        | 0.262                  | -      |
|                |                |           | Treatment<br>× Cultivar | 0.054     | 0.581                     | 0.678          | 0.093                         | 0.017        | 0.064                  | 0.491  |
|                |                |           | Treatment<br>× Year     | 0.304     | 0.443                     | 0.310          | 0.130                         | 0.442        | 0.298                  | -      |

**Supplementary Table S13.** Juice characteristics of 'Major', 'Ellis Bitter', and 'Harry Masters Jersey' ('HMJ') apple trees grown in Lansing, NY. Branches on individual trees were subjected to different shading opacities from four weeks after full bloom until harvest in Experiment 3. Values are means  $\pm$  standard error (n= 8 'Major' 2016, 8 'Ellis Bitter' 2016, 8 'Major' 2017, and 8 'HMJ' 2017=32).

| Year           | Cultivar       | Treatment               | Soluble Solid<br>Concentration<br>(°Brix) | pH        | Titrateable<br>Acidity<br>(g malic acid/L) | Total<br>Polyphenols<br>(g GAE/L <sup>2</sup> ) |
|----------------|----------------|-------------------------|-------------------------------------------|-----------|--------------------------------------------|-------------------------------------------------|
| 2016           | 'Major'        | Control                 | 14.1±0.6                                  | 4.53±0.04 | 2.5±0.1                                    | 1.58±0.21                                       |
| 2016           | 'Ellis Bitter' |                         | 11.9±0.3                                  | 4.57±0.02 | 2±0.1                                      | 1.04±0.11                                       |
| 2017           | 'Major'        |                         | 11.2±0.3                                  | 4.48±0.02 | 2±0.1                                      | 1.26±0.08                                       |
| 2017           | 'HMJ'          |                         | 12.5±0.2                                  | 4.73±0.03 | 1.6±0.1                                    | 2.24±0.06                                       |
| 2016           | 'Major'        | Low                     | 12.6±0.5                                  | 4.56±0.03 | 2.5±0.1                                    | 1.24±0.13                                       |
| 2016           | 'Ellis Bitter' |                         | 11.1±0.2                                  | 4.63±0.02 | 2.1±0                                      | 1.01±0.11                                       |
| 2017           | 'Major'        |                         | 10.6±0.2                                  | 4.53±0.03 | 2.1±0                                      | 1.18±0.06                                       |
| 2017           | 'HMJ'          |                         | 12±0.1                                    | 4.8±0.03  | 1.6±0                                      | 2.17±0.11                                       |
| 2016           | 'Major'        | Medium                  | 13.1±0.5                                  | 4.57±0.03 | 2.5±0.1                                    | 1.18±0.14                                       |
| 2016           | 'Ellis Bitter' |                         | 10.6±0.3                                  | 4.64±0.01 | 2±0.1                                      | 0.92±0.09                                       |
| 2017           | 'Major'        |                         | 10.7±0.3                                  | 4.54±0.03 | 2±0                                        | 1.21±0.09                                       |
| 2017           | 'HMJ'          |                         | 11.5±0.1                                  | 4.79±0.02 | 1.6±0                                      | 2.19±0.09                                       |
| 2016           | 'Major'        | High                    | 11.8±0.3                                  | 4.75±0.04 | 2.2±0.1                                    | 0.99±0.05                                       |
| 2016           | 'Ellis Bitter' |                         | 10.3±0.3                                  | 4.7±0.01  | 1.9±0.1                                    | 0.89±0.04                                       |
| 2017           | 'Major'        |                         | 10.5±0.2                                  | 4.58±0.03 | 2±0                                        | 1.29±0.05                                       |
| 2017           | 'HMJ'          |                         | 11.3±0.1                                  | 4.83±0.02 | 1.6±0.1                                    | 2.07±0.08                                       |
| <i>P-value</i> |                |                         |                                           |           |                                            |                                                 |
|                |                | Treatment               | <0.001                                    | <0.001    | 0.021                                      | 0.003                                           |
|                |                | Cultivar                | <0.001                                    | <0.001    | <0.001                                     | <0.001                                          |
|                |                | Year                    | <0.001                                    | 0.010     | <0.001                                     | 0.862                                           |
|                |                | Treatment<br>× Cultivar | 0.348                                     | 0.132     | 0.126                                      | 0.032                                           |
|                |                | Treatment<br>× Year     | 0.010                                     | 0.010     | 0.009                                      | <0.001                                          |

<sup>2</sup>GAE=gallic acid equivalents

**Supplementary Table S14.** Percentage of plant assimilable radiation (PAR) permeating the canopy in different regions of 'GoldRush', 'Major', 'Harry Masters Jersey' ('HMJ'), and 'Somerset Redstreak' ('SRS') apple trees in Experiment 4. The study was conducted in Lansing, NY in 2016, 2017, and 2018. Values are means  $\pm$  standard error ( $n=8 \times 3$  years in 'GoldRush', 8 'Major' in 2016, 8 'HMJ' in 2017, and 8 'SRS' in 2018=32). Different lowercase letters indicate a separation of treatments by the Tukey HSD method at a 5% significance level.

| Cultivar       | Treatment                   | Canopy Exposure PAR (%)      |                             |                             |                             |                |
|----------------|-----------------------------|------------------------------|-----------------------------|-----------------------------|-----------------------------|----------------|
|                |                             | June                         | July                        | August                      | September                   | October        |
| 'GoldRush'     | East                        | 38.1 $\pm$ 2.5               | 57.3 $\pm$ 2.1              | 50.3 $\pm$ 2.7              | 60.7 $\pm$ 3.2              | 56.6 $\pm$ 2.1 |
| 'Major'        |                             | 61.8 $\pm$ 4.2               | 55.0 $\pm$ 6.6              | 52.5 $\pm$ 3.5              | -                           | -              |
| 'HMJ'          |                             | 49.0 $\pm$ 6.4 <sup>b</sup>  | 66.8 $\pm$ 4.0 <sup>b</sup> | 65.5 $\pm$ 2.9 <sup>b</sup> | 48.5 $\pm$ 2.3 <sup>b</sup> | - <sup>b</sup> |
| 'SRS'          |                             | 53.0 $\pm$ 3.3               | 53.7 $\pm$ 3.3              | 73.7 $\pm$ 2.2              | 69.4 $\pm$ 1.9              | -              |
| 'GoldRush'     | West                        | 27.5 $\pm$ 4.3               | 40.9 $\pm$ 5.7              | 41.4 $\pm$ 6.0              | 46.8 $\pm$ 6.3              | 41.1 $\pm$ 5.8 |
| 'Major'        |                             | 58.0 $\pm$ 5.5               | 49.9 $\pm$ 4.3              | 63.5 $\pm$ 2.7              | -                           | -              |
| 'HMJ'          |                             | 47.1 $\pm$ 3.2 <sup>b</sup>  | 62.2 $\pm$ 2.2 <sup>b</sup> | 65.1 $\pm$ 4.6 <sup>b</sup> | 56.4 $\pm$ 3.3 <sup>b</sup> | - <sup>b</sup> |
| 'SRS'          |                             | 60.1 $\pm$ 3.2               | 51.9 $\pm$ 2.9              | 73.1 $\pm$ 3.9              | 67.3 $\pm$ 7.3              | -              |
| 'GoldRush'     | Interior                    | 4.0 $\pm$ 0.9                | 3.6 $\pm$ 0.5               | 4.5 $\pm$ 0.6               | 9.6 $\pm$ 1.8               | 8.9 $\pm$ 2.4  |
| 'Major'        |                             | 11.7 $\pm$ 3.8               | 8.6 $\pm$ 4.2               | 12.3 $\pm$ 3.0              | -                           | -              |
| 'HMJ'          |                             | 9.0 $\pm$ 1.8.0 <sup>c</sup> | 11.4 $\pm$ 3.1 <sup>c</sup> | 6.5 $\pm$ 1.6 <sup>c</sup>  | 5.4 $\pm$ 1.0 <sup>c</sup>  | - <sup>c</sup> |
| 'SRS'          |                             | 16.1 $\pm$ 1.1               | 12.4 $\pm$ 2.2              | 23.0 $\pm$ 3.1              | 19.7 $\pm$ 1.5              | -              |
| 'GoldRush'     | Top                         | 71.5 $\pm$ 2.1               | 76.7 $\pm$ 1.8              | 77.2 $\pm$ 2.2              | 83.8 $\pm$ 2.0              | 80.7 $\pm$ 2.2 |
| 'Major'        |                             | 76.8 $\pm$ 4.3               | 65.8 $\pm$ 4.1              | 76.0 $\pm$ 4.4              | -                           | -              |
| 'HMJ'          |                             | 71.6 $\pm$ 2.4 <sup>a</sup>  | 82.8 $\pm$ 1.9 <sup>a</sup> | 84.5 $\pm$ 2.6 <sup>a</sup> | 82.5 $\pm$ 2.6 <sup>a</sup> | - <sup>a</sup> |
| 'SRS'          |                             | 87.6 $\pm$ 4.3               | 72.8 $\pm$ 2.7              | 87.8 $\pm$ 2.2              | 84.7 $\pm$ 0.9              | -              |
| <i>P-value</i> | Treatment                   | <0.001                       | <0.001                      | <0.001                      | <0.001                      | <0.001         |
|                | Cultivar                    | <0.001                       | 0.053                       | <0.001                      | 0.533                       | -              |
|                | Year                        | 0.151                        | 0.003                       | <0.001                      | <0.001                      | <0.001         |
|                | Treatment $\times$ Cultivar | 0.111                        | 0.050                       | <0.001                      | 0.127                       | -              |
|                | Treatment $\times$ Year     | 0.158                        | 0.002                       | <0.001                      | 0.003                       | 0.266          |

**Supplementary Table S15.** Growing degree days base 10 °C in different regions of 'GoldRush', and 'Harry Masters Jersey' ('HMJ') apple trees grown in Experiment 4 in Lansing, NY in 2017. Values are means  $\pm$  standard error (n = 4 'GoldRush' and n = 8 'HMJ'). Different lowercase letters indicate a separation of treatments by the Tukey HSD method at a 5% significance level.

| Cultivar       | Treatment            | Growing Degree Days base 10°C |    |                                       |
|----------------|----------------------|-------------------------------|----|---------------------------------------|
|                |                      | 1-6 Weeks After Full Bloom    |    | 1 Week After Full Bloom Until Harvest |
| 'GoldRush'     | East                 | 328.8±2.3                     | ab | 1334.4±9.2                            |
| 'HMJ'          |                      | 333.7±8.2                     |    | 976.0±20.0                            |
| 'GoldRush'     | West                 | 337.9±5.7                     | a  | 1400.8±22.7                           |
| 'HMJ'          |                      | 353.5±7.9                     |    | 1075.7±30.0                           |
| 'GoldRush'     | Interior             | 323.3±6.8                     | b  | 1287.1±17.8                           |
| 'HMJ'          |                      | 322.6±4.4                     |    | 939.7±13.2                            |
| 'GoldRush'     | Top                  | 330.8±5.0                     | a  | 1362.0±22.5                           |
| 'HMJ'          |                      | 359.3±3.0                     |    | 1096.2±21.0                           |
| <i>P-value</i> | Treatment            | 0.004                         |    | <0.001                                |
|                | Cultivar             | 0.009                         |    | <0.001                                |
|                | Treatment × Cultivar | 0.124                         |    | 0.182                                 |

**Supplementary Table S16.** Fruit characteristics of apples from different regions of 'GoldRush', 'Major', 'Harry Masters Jersey' ('HMJ'), and 'Somerset Redstreak' ('SRS') apple tree canopies grown in Experiment 4. The study was conducted in Lansing, NY in 2016, 2017, and 2018. Values are means  $\pm$  standard error ( $n=8 \times 3$  years in 'GoldRush', 8 'Major' in 2016, 8 'HMJ' in 2017, and 8 'SRS' in 2018=32). Different lowercase letters indicate a separation of treatments by the Tukey HSD method at a 5% significance level.

| Cultivar       | Treatment                   | Mass (g)                    | Peel Blush (%)               | Green Scale (1-5) | Chlorophyll a Index          | Starch Pattern Index (1-8) | Firmness (N)    |
|----------------|-----------------------------|-----------------------------|------------------------------|-------------------|------------------------------|----------------------------|-----------------|
| 'GoldRush'     | East                        | 186.9 $\pm$ 9.5             | -                            | 2.6 $\pm$ 0.1     | 0.41 $\pm$ 0.07              | 4.3 $\pm$ 0.2              | 71.7 $\pm$ 3.8  |
| 'Major'        |                             | 63.3 $\pm$ 3.4              | 46.6 $\pm$ 3.3               | -                 | -                            | 3.3 $\pm$ 0.2              | 77.6 $\pm$ 2.0  |
| 'HMJ'          |                             | 68.6 $\pm$ 2.6 <sup>a</sup> | 68.1 $\pm$ 11.5 <sup>a</sup> | - <sup>b</sup>    | 1.37 $\pm$ 0.15 <sup>a</sup> | 3.0 $\pm$ 0.2 <sup>a</sup> | 101.8 $\pm$ 1.6 |
| 'SRS'          |                             | 67.5 $\pm$ 3.4              | 64.3 $\pm$ 3.6               | -                 | 1.14 $\pm$ 0.05              | 4.9 $\pm$ 0.3              | 74.8 $\pm$ 2.0  |
| 'GoldRush'     | West                        | 187.4 $\pm$ 10.5            | -                            | 2.7 $\pm$ 0.1     | 0.33 $\pm$ 0.06              | 4.8 $\pm$ 0.2              | 69.4 $\pm$ 3.4  |
| 'Major'        |                             | 63.7 $\pm$ 2.5              | 33.8 $\pm$ 2.5               | -                 | -                            | 3.3 $\pm$ 0.3              | 76 $\pm$ 1.4    |
| 'HMJ'          |                             | 70.1 $\pm$ 2.2 <sup>a</sup> | 72.8 $\pm$ 4.5 <sup>a</sup>  | - <sup>bc</sup>   | 1.28 $\pm$ 0.08 <sup>a</sup> | 3.1 $\pm$ 0.2 <sup>a</sup> | 96.1 $\pm$ 2.0  |
| 'SRS'          |                             | 62.9 $\pm$ 3.4              | 61.3 $\pm$ 2.3               | -                 | 1.15 $\pm$ 0.05              | 5.1 $\pm$ 0.2              | 76.7 $\pm$ 0.8  |
| 'GoldRush'     | Interior                    | 175.9 $\pm$ 7.5             | -                            | 3.2 $\pm$ 0.1     | 0.54 $\pm$ 0.09              | 4.3 $\pm$ 0.3              | 70.5 $\pm$ 3.7  |
| 'Major'        |                             | 59.0 $\pm$ 1.9              | 5.8 $\pm$ 1.4 <sup>b</sup>   | -                 | -                            | 2.7 $\pm$ 0.2              | 67.7 $\pm$ 9.9  |
| 'HMJ'          |                             | 69.0 $\pm$ 3.7 <sup>b</sup> | 68.4 $\pm$ 9.1 <sup>b</sup>  | - <sup>a</sup>    | 1.41 $\pm$ 0.09 <sup>b</sup> | 2.8 $\pm$ 0.2 <sup>b</sup> | 101.4 $\pm$ 0.8 |
| 'SRS'          |                             | 58.4 $\pm$ 2.1              | 37.9 $\pm$ 5.3               | -                 | 1.49 $\pm$ 0.03              | 4.0 $\pm$ 0.3              | 78.7 $\pm$ 1.2  |
| 'GoldRush'     | Top                         | 190.9 $\pm$ 11.2            | -                            | 2.3 $\pm$ 0.2     | 0.34 $\pm$ 0.06              | 4.4 $\pm$ 0.2              | 71.4 $\pm$ 3.7  |
| 'Major'        |                             | 62.1 $\pm$ 2.0              | 58.4 $\pm$ 4.3               | -                 | -                            | 3.2 $\pm$ 0.3              | 77.0 $\pm$ 1.3  |
| 'HMJ'          |                             | 70.3 $\pm$ 2.0 <sup>a</sup> | 70.1 $\pm$ 4.5 <sup>a</sup>  | - <sup>c</sup>    | 1.37 $\pm$ 0.09 <sup>a</sup> | 3.0 $\pm$ 0.2 <sup>a</sup> | 101.0 $\pm$ 1.8 |
| 'SRS'          |                             | 62.8 $\pm$ 2.6              | 63.5 $\pm$ 5.3               | -                 | 1.14 $\pm$ 0.05              | 5.2 $\pm$ 0.3              | 76.7 $\pm$ 1.3  |
| <i>P-value</i> | Treatment                   | 0.013                       | <0.001                       | <0.001            | <0.001                       | <0.001                     | 0.072           |
|                | Cultivar                    | <0.001                      | <0.001                       | -                 | <0.001                       | <0.001                     | <0.001          |
|                | Year                        | <0.001                      | <0.001                       | <0.001            | 0.277                        | <0.001                     | <0.001          |
|                | Treatment $\times$ Cultivar | <0.001                      | 0.001                        | -                 | 0.027                        | <0.001                     | <0.001          |
|                | Treatment $\times$ Year     | <0.001                      | 0.001                        | 0.120             | 0.015                        | 0.008                      | 0.026           |



**Supplementary Table S17.** Juice characteristics of apples from different regions of 'GoldRush', 'Major', 'Harry Masters Jersey' ('HMJ'), and 'Somerset Redstreak' ('SRS') apple tree canopies grown in Experiment 4. The study was conducted in Lansing, NY in 2016, 2017, and 2018. Values are means  $\pm$  standard error (n= 8 $\times$ 3 years in 'GoldRush', 8 'Major' in 2016, 8 'HMJ' in 2017, and 8 'SRS' in 2018=32). Different lowercase letters indicate a separation of treatments by the Tukey HSD method at a 5% significance level.

| Cultivar       | Treatment                   | Soluble Solid Concentration ( $^{\circ}$ Brix) | pH                         | Titrateable Acidity (g malic acid/L) | Total Polyphenols (g GAE/L <sup>2</sup> ) |
|----------------|-----------------------------|------------------------------------------------|----------------------------|--------------------------------------|-------------------------------------------|
| 'GoldRush'     | East                        | 13.8 $\pm$ 0.2                                 | 3.4 $\pm$ 0.0              | 9.0 $\pm$ 0.2                        | 0.5 $\pm$ 0.0                             |
| 'Major'        |                             | 15.1 $\pm$ 0.3                                 | 4.4 $\pm$ 0.0              | 2.7 $\pm$ 0.2                        | 1.8 $\pm$ 0.1                             |
| 'HMJ'          |                             | 11.3 $\pm$ 0.2 <sup>ab</sup>                   | 4.6 $\pm$ 0.0 <sup>b</sup> | 1.8 $\pm$ 0.0                        | 1.6 $\pm$ 0.1                             |
| 'SRS'          |                             | 10.5 $\pm$ 0.2                                 | 4.4 $\pm$ 0.0              | 1.7 $\pm$ 0.0                        | 1.5 $\pm$ 0.1                             |
| 'GoldRush'     | West                        | 13.3 $\pm$ 0.2                                 | 3.4 $\pm$ 0.0              | 8.4 $\pm$ 0.2                        | 0.4 $\pm$ 0.0                             |
| 'Major'        |                             | 14.3 $\pm$ 0.4                                 | 4.4 $\pm$ 0.0              | 3.0 $\pm$ 0.1                        | 1.6 $\pm$ 0.1                             |
| 'HMJ'          |                             | 11.5 $\pm$ 0.3 <sup>b</sup>                    | 4.5 $\pm$ 0.0 <sup>b</sup> | 2.0 $\pm$ 0.1                        | 1.8 $\pm$ 0.1                             |
| 'SRS'          |                             | 10.8 $\pm$ 0.2                                 | 4.4 $\pm$ 0.0              | 1.6 $\pm$ 0.0                        | 1.5 $\pm$ 0.1                             |
| 'GoldRush'     | Interior                    | 12.8 $\pm$ 0.2                                 | 3.5 $\pm$ 0.0              | 8.3 $\pm$ 0.2                        | 0.4 $\pm$ 0                               |
| 'Major'        |                             | 12.9 $\pm$ 0.4                                 | 4.4 $\pm$ 0.0              | 2.9 $\pm$ 0.1                        | 1.2 $\pm$ 0.1                             |
| 'HMJ'          |                             | 10.2 $\pm$ 0.3 <sup>c</sup>                    | 4.6 $\pm$ 0.0 <sup>a</sup> | 2.1 $\pm$ 0.0                        | 1.4 $\pm$ 0.1                             |
| 'SRS'          |                             | 9.7 $\pm$ 0.1                                  | 4.4 $\pm$ 0.0              | 1.9 $\pm$ 0.0                        | 1.6 $\pm$ 0.1                             |
| 'GoldRush'     | Top                         | 14.3 $\pm$ 0.2                                 | 3.4 $\pm$ 0.0              | 8.9 $\pm$ 0.2                        | 0.5 $\pm$ 0.0                             |
| 'Major'        |                             | 15.1 $\pm$ 0.5                                 | 4.4 $\pm$ 0.0              | 2.8 $\pm$ 0.1                        | 1.9 $\pm$ 0.1                             |
| 'HMJ'          |                             | 11.5 $\pm$ 0.3 <sup>a</sup>                    | 4.5 $\pm$ 0.0 <sup>b</sup> | 1.9 $\pm$ 0.0                        | 1.9 $\pm$ 0.1                             |
| 'SRS'          |                             | 10.9 $\pm$ 0.2                                 | 4.4 $\pm$ 0.0              | 1.6 $\pm$ 0.0                        | 1.8 $\pm$ 0.1                             |
| <i>P-value</i> | Treatment                   | <0.001                                         | <0.001                     | 0.828                                | <0.001                                    |
|                | Cultivar                    | <0.001                                         | <0.001                     | <0.001                               | <0.001                                    |
|                | Year                        | <0.001                                         | 0.006                      | <0.001                               | 0.132                                     |
|                | Treatment $\times$ Cultivar | 0.058                                          | 0.100                      | <0.001                               | <0.001                                    |
|                | Treatment $\times$ Year     | <0.001                                         | 0.165                      | <0.001                               | 0.876                                     |
|                |                             |                                                |                            |                                      |                                           |

<sup>2</sup>GAE=gallic acid equivalent
